# Supplementary material for: Limited Intervention in Adult Scoliosis—A Systematic Review
Source: MDPI journal article supplement (doi:10.3390/jcm13041030), 2024-02-11
Supplement: s1 [file s1]

Supplementary Table S1. Risk of Bias Assessment

| Study                   | Bias due to confounding | Bias in selection of participants into the study | Bias in classification of interventions | Bias due to deviations from intended interventions | Bias due to missing data | Bias in measurement of outcomes | Bias in selection of the reported result | Overall Bias |
|-------------------------|-------------------------|--------------------------------------------------|-----------------------------------------|----------------------------------------------------|--------------------------|---------------------------------|------------------------------------------|--------------|
| Nakajima et al. 2022    | Low                     | Low                                              | Low                                     | Low                                                | Low                      | Low                             | Low                                      | Low          |
| Cho et al. 2008         | Low                     | Low                                              | Low                                     | Low                                                | Low                      | Low                             | Low                                      | Low          |
| Liu et al. 2009         | Moderate                | Low                                              | Low                                     | Low                                                | Low                      | Low                             | Low                                      | Moderate     |
| Wang et al. 2016        | Moderate                | Low                                              | Low                                     | Low                                                | Low                      | Low                             | Low                                      | Moderate     |
| Li et al. 2021          | Moderate                | Low                                              | Low                                     | Low                                                | Low                      | Low                             | Low                                      | Moderate     |
| Song et al. 2022        | Moderate                | Low                                              | Low                                     | Low                                                | Low                      | Low                             | Low                                      | Moderate     |
| Khalifé et al. 2023     | Moderate                | Low                                              | Low                                     | Moderate                                           | Low                      | Low                             | Low                                      | Moderate     |
| Schairer et al. 2013    | Moderate                | Low                                              | Low                                     | Moderate                                           | Low                      | Low                             | Low                                      | Moderate     |
| Hart et al. 2013        | Moderate                | Low                                              | Low                                     | Low                                                | Low                      | Low                             | Low                                      | Moderate     |
| Hart et al. 2014        | Serious                 | Low                                              | Low                                     | Moderate                                           | Low                      | Low                             | Low                                      | Serious      |
| Isaacs et al. 2010      | Moderate                | Low                                              | Low                                     | Low                                                | Low                      | Low                             | Low                                      | Moderate     |
| Pateder et al. 2008     | Low                     | Low                                              | Low                                     | Low                                                | Low                      | Low                             | Low                                      | Low          |
| Frazier et al. 1997     | Moderate                | Low                                              | Low                                     | Low                                                | Low                      | Low                             | Low                                      | Moderate     |
| Minamide et al. 2017    | Low                     | Low                                              | Low                                     | Low                                                | Moderate                 | Low                             | Low                                      | Moderate     |
| Aoki et al. 2015        | Low                     | Low                                              | Low                                     | Low                                                | Low                      | Low                             | Low                                      | Low          |
| Bari et al. 2021        | Moderate                | Low                                              | Low                                     | Moderate                                           | Moderate                 | Low                             | Low                                      | Moderate     |
| Lugue et al. 2020       | Low                     | Low                                              | Low                                     | Low                                                | Moderate                 | Low                             | Low                                      | Moderate     |
| Pugely et al. 2014      | Moderate                | Low                                              | Low                                     | Low                                                | Low                      | Low                             | Low                                      | Moderate     |
| Kapetanakis et al. 2017 | Low                     | Low                                              | Low                                     | Low                                                | Low                      | Low                             | Low                                      | Low          |
| Kim et al. 2021         | Serious                 | Low                                              | Low                                     | Low                                                | Low                      | Low                             | Low                                      | Serious      |
| Bai et al. 2017         | Serious                 | Low                                              | Low                                     | Low                                                | Low                      | Low                             | Low                                      | Serious      |
| Telfeian et al. 2018    | Low                     | Low                                              | Low                                     | Low                                                | Low                      | Low                             | Low                                      | Low          |
| Madhavan et al. 2016    | Low                     | Low                                              | Low                                     | Low                                                | Low                      | Low                             | Moderate                                 | Moderate     |
| Brodke et al. 2013      | Moderate                | Low                                              | Low                                     | Low                                                | Low                      | Low                             | Low                                      | Moderate     |
| Hasan et al. 2019       | Moderate                | Low                                              | Low                                     | Low                                                | Low                      | Low                             | Low                                      | Moderate     |

|                          |          |     |     |          |          |     |          |          |
|--------------------------|----------|-----|-----|----------|----------|-----|----------|----------|
| Uribe et al. 2017        | Low      | Low | Low | Low      | Low      | Low | Low      | Low      |
| Deukmedjian et al. 2013  | Moderate | Low | Low | Low      | Low      | Low | Moderate | Moderate |
| Park et al. 2013         | Moderate | Low | Low | Low      | Low      | Low | Low      | Moderate |
| Liang et al. 2020        | Moderate | Low | Low | Moderate | Low      | Low | Low      | Moderate |
| Amara et al. 2019        | Moderate | Low | Low | Low      | Low      | Low | Low      | Moderate |
| Chou et al. 2018         | Low      | Low | Low | Low      | Low      | Low | Low      | Low      |
| Kasliwal et al. 2012     | Low      | Low | Low | Low      | Low      | Low | Low      | Low      |
| Zurbriggen et al. 1999   | Low      | Low | Low | Low      | Low      | Low | Low      | Low      |
| Feng et al. 2015         | Moderate | Low | Low | Low      | Low      | Low | Low      | Moderate |
| Johnson et al. 2013      | Moderate | Low | Low | Low      | Moderate | Low | Low      | Moderate |
| Anand et al. 2008        | Low      | Low | Low | Serious  | Low      | Low | Low      | Serious  |
| Hasegawa and Homma 2003  | Low      | Low | Low | Low      | Low      | Low | Low      | Low      |
| Dakwar et al. 2010       | Serious  | Low | Low | Moderate | Low      | Low | Low      | Serious  |
| Lee et al. 2016          | Moderate | Low | Low | Moderate | Low      | Low | Low      | Moderate |
| Ahlquist et al. 2018     | Moderate | Low | Low | Moderate | Low      | Low | Low      | Moderate |
| Anand et al. 2010        | Moderate | Low | Low | Low      | Low      | Low | Moderate | Moderate |
| Lo et al. 2015           | Low      | Low | Low | Low      | Low      | Low | Moderate | Moderate |
| Seng et al. 2013         | Low      | Low | Low | Low      | Low      | Low | Moderate | Moderate |
| Alimi et al. 2015        | Moderate | Low | Low | Moderate | Low      | Low | Low      | Moderate |
| Tani et al. 2022         | Moderate | Low | Low | Low      | Low      | Low | Low      | Moderate |
| Elsamadicy et al. 2017   | Moderate | Low | Low | Low      | Low      | Low | Low      | Moderate |
| Kanayama et al. 2007     | Moderate | Low | Low | Low      | Low      | Low | Moderate | Moderate |
| Di Silvestre et al. 2010 | Moderate | Low | Low | Low      | Low      | Low | Low      | Moderate |
| Zhao et al. 2020         | Moderate | Low | Low | Low      | Low      | Low | Low      | Moderate |
